1 Title: Screening for common mental disorders in caregivers of children with severe acute  
2 malnutrition in a nutritional rehabilitation centre using the WHO Self-Reporting  
3 Questionnaire- 20

4 Short Title: Screening for common mental disorders in caregivers of children with severe acute  
5 malnutrition

6

7 Radhika Mathur<sup>1¶\*</sup>, Nisha Kamble<sup>2¶</sup>, Saba Pathan<sup>3¶</sup>, Tejal Lakhan<sup>4&</sup>, Ayushi Shah<sup>1&</sup>, Sanjay  
8 Prabhu<sup>1&</sup>, Minnie Bodhanwala<sup>1&</sup>

9

10 <sup>1</sup>State Centre of Excellence in Pediatric Nutrition, Nutritional Rehabilitation Centre, Bai  
11 Jerbai Wadia Hospital for Children, Mumbai, Maharashtra, India.

12 <sup>2</sup>Department of Occupational Therapy, Bai Jerbai Wadia Hospital for Children, Mumbai,  
13 Maharashtra, India.

14 <sup>3</sup>Child development Centre, Division of Neurosciences, Bai Jerbai Wadia Hospital for  
15 Children, Mumbai, Maharashtra, India.

16 <sup>4</sup>Department of Institutional Ethics, Bai Jerbai Wadia Hospital for Children, Mumbai,  
17 Maharashtra, India.

18 Corresponding Author: \*Radhika Mathur

19 Email address: [dr.radhikamathursharma@gmail.com](mailto:dr.radhikamathursharma@gmail.com)

20 ¶These authors contributed equally to this work.

21 &These authors also contributed equally to this work.

22 NOTE: This preprint reports new research that has not been certified by peer review and should not be used to guide clinical practice.

23

## 24 **Abstract**

25 A high number of caregivers of children admitted for inpatient treatment of Severe Acute  
26 Malnutrition (SAM) at the Nutritional Rehabilitation Centre (NRC), experience  
27 psychological distress. It is essential for the caregiver, generally the mother, to feed, hold,  
28 comfort, and play with her child as much as possible to promote opportunities for early  
29 learning and faster recovery from SAM. Hence, identification of mental health issues among  
30 the caregivers is imperative. Using WHO Self-reporting questionnaire (SRQ) 20 score to  
31 screen for common mental disorders (CMD) of caregivers of children admitted with SAM.  
32 The primary caregiver was interviewed using WHO SRQ-20 scoring. Based on the questions  
33 answered YES, the total score was given. A total score of > 8 was considered as a positive  
34 screen. These positive-screened caregivers were forwarded to a psychologist. We also  
35 compared the CMD prevalence between caregivers of children with primary SAM versus  
36 those with secondary SAM. There were a total of 29.1% (n=60) of the caregivers who were  
37 screened positive for CMD. The category of CMD most prevalent on screening was somatic  
38 issues, followed by depression, anxiety, and cognitive symptoms. Caregivers of children with  
39 pre-existing co-morbidity were higher in number than those without one on a positive screen.  
40 Maternal mental health is widely neglected, especially in an NRC setting across the country.  
41 For mothers of children with severe wasting, underlying mental stressors are significant  
42 contributors to the child's malnourished state. Through this study, we hope to incorporate  
43 maternal mental health screening in NRCs for better management of these cases.

44

45

46

## 47 **Introduction**

48 The WHO definition of maternal mental health is ‘a state of well-being in which a mother  
49 realizes her own abilities, can cope with the normal stresses of life, can work productively  
50 and fruitfully and is able to make a contribution to her community’ [1].

51 Maternal or caregivers’ mental health can significantly affect the nutrition of the child  
52 through various mechanisms. Breastfeeding being the initial mainstay for providing adequate  
53 nutrition to the child, maternal mental health, particularly stress and anxiety, can impact  
54 breastfeeding. Perinatal depression and anxiety are common, with prevalence rates for major  
55 and minor depression up to almost 20% during pregnancy and the first 3 months postpartum.  
56 In addition, perinatal psychiatric disorders hinder a woman's functioning and correlate with  
57 less-than-optimal development in her offspring [2]. It was also acknowledged that the  
58 presence of common mental disorders (CMD) during pregnancy predicts postpartum  
59 depression and anxiety disorders, highlighting the underdiagnosis and undertreatment of this  
60 condition [3].

61 Extrapolating perinatal mental health to the mental health of mothers with malnourished  
62 children, we can assume similar findings. About 80% of brain growth occurs within the first  
63 2 years of life. A parent, grandparent, or other caring adult plays the most important role in  
64 supporting the emotional and cognitive development of children. Children with severe acute  
65 malnutrition (SAM) have an elevated risk of mortality and morbidity. There has been a  
66 manifold increase in SAM prevalence (7.7%) in several Indian districts as per the NFHS -5  
67 data, which requires urgent policy response [4]. Responsive parenting and sensory  
68 stimulation play a key role in recovery by reducing the risk of developmental and emotional  
69 problems in children with SAM, which is also noted in SAM management guidelines [5].

70 However, there is data showing a high number of caregivers of children admitted for  
71 inpatient treatment of SAM experiencing psychological distress, depressive symptoms, and  
72 suicidal behaviour [6]. When mothers are involved in the overall care of their child at the  
73 hospital, they learn how to continue caring for their children at home. This study aimed to  
74 assess the burden of caregiver mental health status among caregivers who are admitted to the  
75 nutritional rehabilitation department with their children who are severely wasted.

## 76 **Materials and Methods**

77 This study is a cross-sectional observational research study conducted at a tertiary care  
78 children hospital Nutritional Rehabilitation Centre (NRC) from 25<sup>th</sup> July 2023 to 25<sup>th</sup> March  
79 2024. We included the primary caregivers of all children, who were majorly mothers. An  
80 approval from the Institutional Ethics Committee–Human Research was obtained before the  
81 commencement of the study. We excluded the cases whose primary caregiver could not be  
82 present with the child during the assessment. As per the standard of care, all children  
83 admitted to the NRC were treated based on the WHO guidelines adapted by the Ministry of  
84 Health and Family Welfare, Government of India [5] for the treatment of SAM children.  
85 SAM is defined as children 6 weeks to 6 months with weight-for-age (WFA) < -2SD or  
86 weight-for-height (WFH) < -2 SD, or severe visible wasting or nutritional edema; 6 months  
87 to 59 months WFH < -3SD, visible severe wasting or nutritional edema [7].

88 At the time of admission, the primary caregiver, the attendant who stayed with the admitted  
89 child, was interviewed using the WHO Self Reporting Questionnaire (SRQ) 20 scoring (8)  
90 screening tool by the NRC staff after sharing the study information sheet and taking consent  
91 for the same. Based on the questions answered YES, the total score was given, wherein 1  
92 point indicate a YES and 0 was NO. A total score of more than 8 was considered to be a  
93 positive screen. The answers were given based on the last 1-month experience of the

94 caregiver. Only screening for CMD was carried out and no diagnosis was made. Based on the  
95 specific questions answered YES, the issues were divided into cognitive symptoms, anxiety,  
96 depression, and somatoform issues based on the user guidebook of the screening tool [8], and  
97 this was not disclosed to the person screened.

98 These positive-screened caregivers were then referred to the Clinical Psychologist for an in-  
99 depth screening for anxiety and depression disorders based on the Diagnostic and Statistical  
100 Manual of Mental Disorders – 5<sup>th</sup> Edition (DSM 5) [9]. A self-designed, psychological  
101 proforma was used for identifying the basic antenatal and postnatal concerns and significant  
102 stressors based on the biopsychosocial model. Mental Status Examination (MSE) was  
103 employed for each caregiver [10]. The stressors were categorized into 3 categories, i.e., child-  
104 related, family-related, and social (lack of social/financial support). The severity of stressors  
105 was marked on a Likert scale ranging from 0–4 (0-not applicable, 1-mild, 2- moderate, 3-  
106 severe, 4-very severe). Suicide ideations were marked on a binary scale of 0 or 1 (0-no, 1-  
107 yes). Based on the outcome of the interview, the caregivers were provided counselling  
108 therapy and offered the option to continue the therapy. Those caregivers identified to have  
109 very severe ratings were then referred to the psychiatrist for necessary pharmacological  
110 treatment.

111 Statistical analysis: Data was analysed using SPSS (Version 21.0) software. Categorical data  
112 was summarized as percentages, whereas continuous data was summarized using mean and  
113 standard deviation (SD). Mean scores between different subgroups were compared using the  
114 unpaired t-test. The association between two categorical variables was determined using the  
115 chi-square test. Multivariate analysis was performed using the linear regression model as the  
116 dependent variable is continuous in nature.

117 **Ethics Statement:** The study was conducted after institutional ethics approval and after  
118 obtaining written informed consent from the study participants.

## 119 **Results**

120 A total of 206 caregivers were screened, of which 29.1% (n=60) had a score of greater than 8,  
121 i.e., screened positive for CMD and all of them were mothers of the child admitted. The  
122 category of CMD which was most prevalent on screening among the ones who were positive  
123 were somatic (Mean: 4.35±1.58; Median: 4) followed by depression (Mean: 4.30±1.63;  
124 Median: 4), anxiety (Mean: 2.18±0.81; Median: 2), and cognition (Mean: 1.63±0.96; Median:  
125 2) based on the WHO SRQ-20 screening tool. Caregivers of children with pre-existing co-  
126 morbidity (neurologically impaired, congenital heart disease, structural co-morbidities, etc.)  
127 were higher in number than ones without co-morbidity on a positive screen. Out of positive  
128 60 screened, 26 had children less than 6 months of age. Out of 60 mothers who were  
129 evaluated and screened positive for CMD using WHO SRQ-20, 33 caregivers were  
130 interviewed further to understand the associated factors of CMD. These 33 mothers were  
131 selected as it was difficult to follow up with all the mothers. Among the mothers screened  
132 positive on the WHO SRQ-20 screening tool, 87.9% (29/33) were from a low socioeconomic  
133 stratum, 18.2% (6/33) were educated under 10<sup>th</sup> standard, 16% (16/33) up to 10<sup>th</sup> standard,  
134 18.2% (2/33) up to 12<sup>th</sup> Standard. Additionally, 21.2% (7/33) had more than three children  
135 and 12.1% (4/33) had miscarriages in the past. On interviewing the mothers, the predominant  
136 cause of the mental health issues on the Likert scale included child-related (75.8%-severe),  
137 family-related (24.2%-mild) and social causes like lack of family support, poverty (36.4%-  
138 severe). Among the positively screened, 51.3% and 30.3% had depression and anxiety  
139 features, respectively, based on the DSM 5.

140 The Table 1 represents the results of a study investigating various factors related to the need  
 141 for psychiatric evaluation among mothers who screened positive.  
 142 It can be observed that individuals with higher birth orders may be more likely to require  
 143 psychiatric evaluation. Also, there is a significant association between suicide ideations and  
 144 the need for psychiatric evaluation. Individuals reporting suicide ideations are much more  
 145 likely to require evaluation. The table also indicates that individuals lacking support and poor  
 146 education may be more likely to need psychiatric evaluation, and the result is statistically  
 147 significant. However, many other factors examined in the study do not appear to have  
 148 significant associations with the need for psychiatric evaluation.

149 Table 1: Risk factors in the caregiver requiring psychiatric evaluation

| <b>Psychiatric evaluation needed</b> |        |         |    |         |
|--------------------------------------|--------|---------|----|---------|
| <b>Maternal Age at Delivery</b>      | No (%) | Yes (%) | N  | p-value |
| <=20 yrs                             | 75.0   | 25.0    | 4  | .845    |
| 21-25 yrs                            | 69.2   | 30.8    | 13 |         |
| 26-30 yrs                            | 54.5   | 45.5    | 11 |         |
| >30 yrs                              | 60.0   | 40.0    | 5  |         |
| <b>Birth Order</b>                   |        |         |    |         |
| 1                                    | 86.7   | 13.3    | 15 | .070*   |
| 2                                    | 54.5   | 45.5    | 11 |         |
| 3                                    | 50.0   | 50.0    | 2  |         |
| 4                                    | 33.3   | 66.7    | 3  |         |
| 5                                    | 0.0    | 100.0   | 2  |         |
| <b>Suicide ideations</b>             |        |         |    |         |
| Absent                               | 73.1   | 26.9    | 26 | .030**  |

|                              |      |       |    |       |
|------------------------------|------|-------|----|-------|
| Present                      | 28.6 | 71.4  | 7  |       |
| <b>Support</b>               |      |       |    |       |
| No                           | 25.0 | 75.0  | 4  | .087* |
| Yes                          | 69.0 | 31.0  | 29 |       |
| <b>Socio-economic Status</b> |      |       |    |       |
| Low                          | 65.5 | 34.5  | 29 | .545  |
| Middle                       | 50.0 | 50.0  | 4  |       |
| <b>Education</b>             |      |       |    |       |
| 5 <sup>th</sup> std          | 0.0  | 100.0 | 3  | .094* |
| 8 <sup>th</sup> std          | 33.3 | 66.7  | 3  |       |
| 10 <sup>th</sup> std         | 75.0 | 25.0  | 16 |       |
| 12 <sup>th</sup> std         | 66.7 | 33.3  | 6  |       |
| 15 <sup>th</sup> std         | 80.0 | 20.0  | 5  |       |
| <b>Miscarriage</b>           |      |       |    |       |
| None                         | 65.5 | 34.5  | 29 | .405  |
| 1                            | 66.7 | 33.3  | 3  |       |
| 2                            | 0.0  | 100.0 | 1  |       |
| <b>Child Death</b>           |      |       |    |       |
| None                         | 66.7 | 33.3  | 27 | .566  |
| 1                            | 66.7 | 33.3  | 3  |       |
| 2                            | 50.0 | 50.0  | 2  |       |
| 3                            | 0.0  | 100.0 | 1  |       |
| <b>Antenatal care</b>        |      |       |    |       |
| No                           | 62.5 | 37.5  | 32 | .443  |



|                                         |       |      |    |      |
|-----------------------------------------|-------|------|----|------|
| Yes                                     | 100.0 | 0.0  | 1  |      |
| <b>Anxiety</b>                          |       |      |    |      |
| No                                      | 100.0 | 0.0  | 3  | .170 |
| Yes                                     | 60.0  | 40.0 | 30 |      |
| Note: p-values are from Chi-square test |       |      |    |      |
| *p-value significant at 90% C.I.        |       |      |    |      |
| **p-value significant at 95% C.I.       |       |      |    |      |

150

## 151 Discussion

152 In our study, we found a prevalence of 29.1% of caregivers who were screened positive for  
153 CMD. A study showed that maternal CMD (MCMD) prevalence was as high as 40.7% in  
154 out-patient malnutrition clinics in North-western Nigeria [11]. A case-control study including  
155 294 children aged between 0 and 5 years was conducted in Northeast Brazil using the SRQ-  
156 20 screening tool on caregivers of children diagnosed as moderately or severely  
157 malnourished. MCMD doubled the risk of moderate or severe malnutrition in children  
158 (OR=2.04; 95% CI: 1.10–3.78), thereby proving that maternal caregiving can be an important  
159 factor mediating the relationship between maternal mental health and child malnutrition.  
160 CMDs may impair the mother's ability to perform her role, particularly in deprived  
161 environments [12]. In a study conducted by Samuel Scott et al, it was found that CMD, which  
162 was defined as  $\geq 8$  positive SRQ responses, was reported by 262 women (16%) [13].

163 We found the category of CMD most prevalent on screening were somatic issues followed by  
164 depression, anxiety, and cognitive symptoms, in that order. Caregivers of children with pre-  
165 existing co-morbidity (neurologically impaired, congenital heart disease, structural co-  
166 morbidities, etc) were higher in number than those without co-morbidities on a positive

167 screen. In a study by Ejaz et al, anxiety and depression are prevalent psychiatric conditions in  
168 our society, as indicated by significantly elevated Hospital Anxiety and Depression Scale  
169 (HADS) scores among mothers. Predictors of higher HADS scores in mothers of  
170 malnourished children include advancing maternal age, low birth weight of the child, larger  
171 family size, and low income [14]. A systematic review of studies by Stewert et al indicated a  
172 robust correlation between maternal depressive symptoms, assessed using tools like the WHO  
173 SRQ-20, and infant undernutrition, particularly pronounced within low socio-economic  
174 communities where women encounter heightened adversities and experience lower levels of  
175 empowerment [15]. In a similar study by Rahman A. et al, infants exposed to maternal mental  
176 distress, as determined by the WHO SRQ-20, face an elevated risk of undernutrition [16]. A  
177 multinational study by Nguyen et al also showed that MCMD, affecting nearly half of women  
178 in Bangladesh and one-third in Vietnam, emerged as a significant factor contributing to child  
179 stunting and underweight, respectively. Although CMD affected 39% of women in Ethiopia,  
180 no similar association with child undernutrition was observed. However, maternal CMD  
181 showed a robust association with childhood illnesses across all three countries [17]. A study  
182 by Miranda et al indicated that the converse, i.e., mothers of children with protein energy  
183 malnutrition (PEM) showed a higher rate of mental disturbances than mothers of eutrophic  
184 children [18].

185 As risk factors, we observed that individuals with higher birth orders may be more likely to  
186 require psychiatric evaluation. Also, there is a significant association between suicide  
187 ideations and the need for psychiatric evaluation. Individuals reporting suicide ideations are  
188 much more likely to require evaluation. In a study by Alao et al, antenatal care at primary  
189 healthcare facilities (adjusted odds ratio [aOR: 13], primary education [aOR: 3.255] living in  
190 the south-southern region of the country [aOR: 2.207], poor breastfeeding support [aOR:  
191 1.467], polygamous family settings [aOR: 2.182], and a previous history of mental health

192 disorders [aOR: 4.684] were significantly associated with CMD. In contrast, those from the  
193 middle and lower socioeconomic classes were less likely to develop CMD, with [aOR: 0.532]  
194 and [aOR: 0.493], respectively [19]. Additionally, several factors can contribute to maternal  
195 mental health issues when caring for malnourished children, including emotional stress due to  
196 their child with co-morbid conditions like congenital heart disease, cerebral palsy, chronic  
197 lung disease, anatomical defects, etc., can be emotionally distressing for mothers. This was  
198 also observed in our study for mothers whose children had secondary SAM. They may  
199 experience feelings of guilt, helplessness, and worry about their child's health and future.  
200 Mothers may experience stress and anxiety related to financial difficulties, including  
201 concerns about affording nutritious food, medical treatment, and other basic needs for their  
202 child.

203 Malnutrition can affect the parent-child relationship, as mothers may feel distressed or  
204 inadequate if they perceive themselves as failing to meet their child's nutritional needs.  
205 Maternal health can also be directly affected by the stress and strain of caring for a  
206 malnourished child. Addressing maternal mental health is essential for the well-being of both  
207 mothers and their malnourished children. Providing mothers with emotional support, access  
208 to mental health services, and interventions to alleviate financial strain and social isolation  
209 can help mitigate the impact of maternal mental health issues on caregiving and child health  
210 outcomes.

211 Moving forward, it is imperative that maternal or caregiver mental health be looked at closely  
212 especially in a nutritional rehabilitation set up. A study by Rahman A et al showed that  
213 interventions administered by trained non-specialist health and community workers  
214 demonstrated greater efficacy than standard care for both mothers and children. Furthermore,  
215 where evaluated, benefits to the child encompassed enhanced mother-infant interaction,  
216 improved cognitive development and growth, decreased incidences of diarrheal episodes, and

217 higher rates of immunization [20]. Maternal mental health services must be integrated into  
218 the facility-based management, i.e., NRC management of acute malnutrition programs to  
219 provide more holistic care and possibly improve long-term outcomes after discharge from  
220 these programs.

## 221 **Conclusion**

222 CMD among caregivers affects child nutrition and developmental status and contributes  
223 to delayed resolution from malnourishment. It has been seen that the prevalence of CMDs  
224 in caregivers of SAM children is high in India. The WHO SRQ-20 validated screening  
225 tool could be considered as a standardised tool to be used in all NRCs. A forward plan  
226 must be established for the mothers who have been screened positive for CMDs from  
227 NRCs. Importance of screening all mothers with children admitted in NRCs for CMD  
228 should be emphasized.

## 229 **References**

- 230 1. Herrman H, Saxena S & Moodie R (2006) Promoting Mental Health: Concepts,  
231 Emerging Evidence, Practice. WHO, Geneva.
- 232 2. O'Hara MW, Wisner KL. Perinatal mental illness: definition, description and  
233 aetiology. *Best Pract Res Clin Obstet Gynaecol.* 2014 Jan;28(1):3-12. doi:  
234 10.1016/j.bpobgyn.2013.09.002. Epub 2013 Oct 7. PMID: 24140480; PMCID:  
235 PMC7077785.
- 236 3. Borba P, Zambaldi CF, Cantilino A, Sougey EB. Common mental disorders in  
237 mothers vs. infant and obstetric outcomes: a review. *Trends Psychiatry Psychother.*  
238 2012;34(4):171-7. doi: 10.1590/s2237-60892012000400002. PMID: 25923065.

- 239 4. NFHS-5 National family health survey. Government of India: Ministry of Health and  
240 Family Welfare, 2020.
- 241 5. Facility based care of severe acute malnutrition: Ministry of Health and Family  
242 welfare; Government of India and NRHM; Pg 27.
- 243 6. Ware SG, Daniel AI, Bandawe C, Mulaheya YP, Nkunika S, Nkhoma D, Kokota D,  
244 Stewart RC, Voskuil W. Perceptions and experiences of caregivers of severely  
245 malnourished children receiving inpatient care in Malawi: An exploratory study.  
246 Malawi Med J. 2018 Sep;30(3):167-173. doi: 10.4314/mmj.v30i3.7. PMID:  
247 30627351; PMCID: PMC6307046.
- 248 7. World Health Organization. (2023). WHO guideline on the prevention and  
249 management of wasting and nutritional oedema (acute malnutrition) in infants and  
250 children under 5 years. World Health Organization.  
251 <https://iris.who.int/handle/10665/376075>. License: CC BY-NC-SA 3.0 IGO
- 252 8. A Users guide to the self reporting questionnaire (SRQ);  
253 page3.WHO/MNH/PSF/94.8, English only Distr General.
- 254 9. DSM-V: American Psychiatric Association. Diagnostic and Statistical Manual of  
255 Mental Disorders (5th edn). APA, 2013.
- 256 10. Trzepacz PT, Baker RW. The psychiatric mental status examination. Oxford  
257 University Press; 1993 Aug 19.
- 258 11. Abdullahi AT, Farouk ZL, Imam A. Common mental disorders in mothers of children  
259 attending out-patient malnutrition clinics in rural North-western Nigeria: a cross-  
260 sectional study. BMC Public Health. 2021 Jan 21;21(1):185. doi: 10.1186/s12889-  
261 021-10227-8. PMID: 33478451; PMCID: PMC7818054.
- 262 12. Cavalcante-Neto JL, Paula CS, Florêncio TM, Miranda CT. Disability due to maternal  
263 common mental disorders (CMDs) as a risk factor for chronic childhood malnutrition:

- 264 cross-sectional study. Sao Paulo Med J. 2016 May 13;134(3):228-33. doi:  
265 10.1590/1516-3180.2015.02342112. PMID: 27191250; PMCID: PMC10496599.
- 266 13. Scott S, Arrieta A, Kumar N, Menon P, Quisumbing A. Multidimensional predictors  
267 of common mental disorders among Indian mothers of 6- to 24-month-old children  
268 living in disadvantaged rural villages with women's self-help groups: A cross-  
269 sectional analysis. PLoS One. 2020 Jun 23;15(6):e0233418. doi:  
270 10.1371/journal.pone.0233418. PMID: 32574218; PMCID: PMC7310838.
- 271 14. Ejaz MS, Sarwat A, Aisha T. Maternal psychiatric morbidity and childhood  
272 malnutrition. Pak J Med Sci 2012;28(5):874-878.
- 273 15. Stewart RC. Maternal depression and infant growth: a review of recent evidence.  
274 Matern Child Nutr. 2007 Apr;3(2):94-107. doi: 10.1111/j.1740-8709.2007.00088.x.  
275 PMID: 17355442; PMCID: PMC6860855.
- 276 16. Rahman A, Lovel H, Bunn J, Iqbal Z, Harrington R. Mothers' mental health and infant  
277 growth: a case-control study from Rawalpindi, Pakistan. Child Care Health Dev. 2004  
278 Jan;30(1):21-7. doi: 10.1111/j.1365-2214.2004.00382.x. PMID: 14678308.
- 279 17. Nguyen PH, Saha KK, Ali D, Menon P, Manohar S, Mai LT, Rawat R, Ruel MT.  
280 Maternal mental health is associated with child undernutrition and illness in  
281 Bangladesh, Vietnam and Ethiopia. Public Health Nutr. 2014 Jun;17(6):1318-27. doi:  
282 10.1017/S1368980013001043. Epub 2013 May 3. PMID: 23642497; PMCID:  
283 PMC10282455.
- 284 18. Claudio Torres de Miranda, Gustavo Tureck et al; Mental Health of the Mothers of  
285 Malnourished Children. Int.J.Epidemiol. 1996 Feb; 25(1), 128-33.  
286 <https://doi.org/10.1093/ije/25.1.128>
- 287 19. Alao MA, Ibrahim OR, Iloh KK, Ayuk AC, Diala UM, Briggs DC, Imam ZO, Yekini  
288 SA, Sotimehin SA, Musa AZ, Famutimi EO, Idris AA, Odimegwu CL, Imam ZK,

289 Medupin PF, Adeyemi AT, Nnamani KO, Tongo OO. Factors associated with  
290 common mental disorders among breastfeeding mothers in tertiary hospital nurseries  
291 in Nigeria. PLoS One. 2023 Mar 9;18(3):e0281704. doi:  
292 10.1371/journal.pone.0281704. PMID: 36893141; PMCID: PMC9997879.

293 20. Rahman A, Fisher J, Bower P, Luchters S, Tran T, Yasamy MT, Saxena S, Waheed  
294 W. Interventions for common perinatal mental disorders in women in low- and  
295 middle-income countries: a systematic review and meta-analysis. Bull World Health  
296 Organ. 2013 Aug 1;91(8):593-601I. doi: 10.2471/BLT.12.109819. Epub 2013 Apr 18.  
297 PMID: 23940407; PMCID: PMC3738304.

298  
299
